# Supplementary material
Source: PubMed Central journal article supplement (PMC1458654)

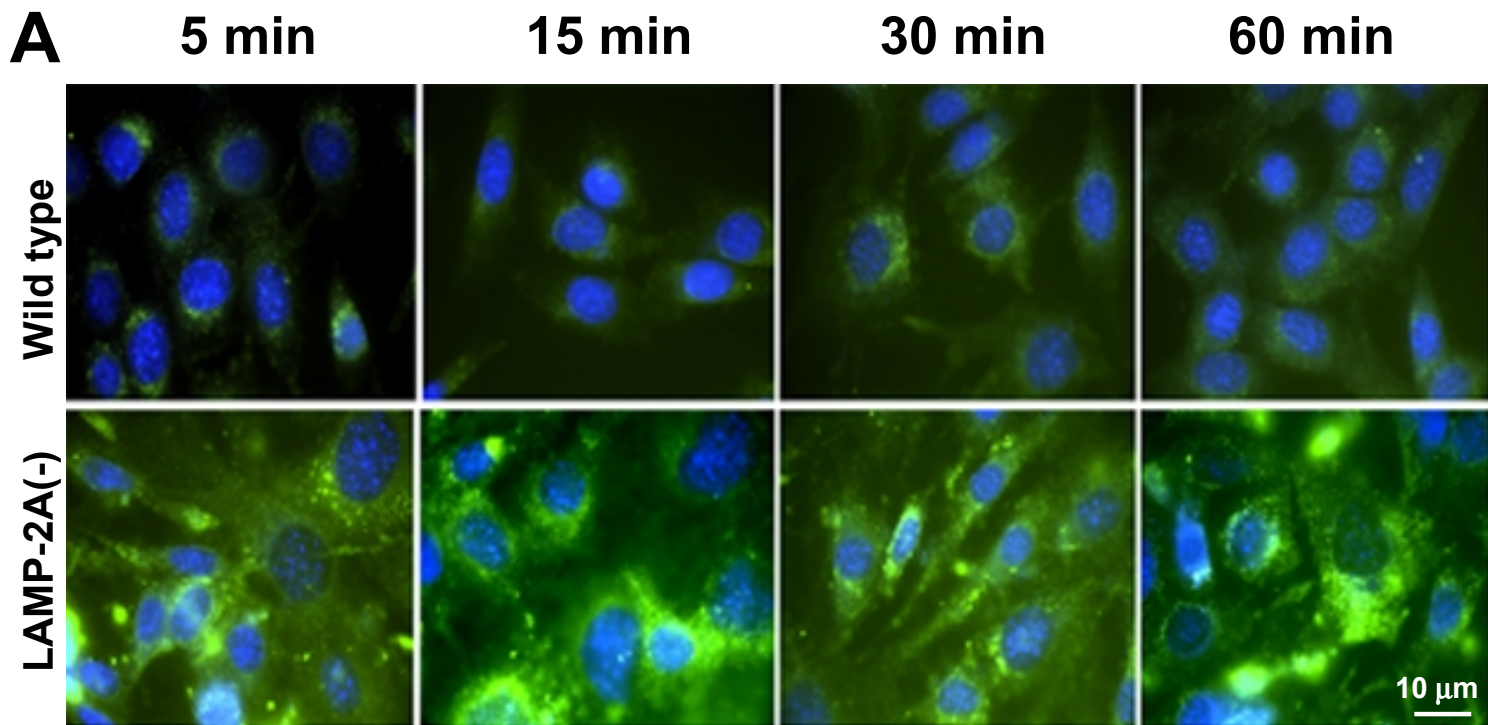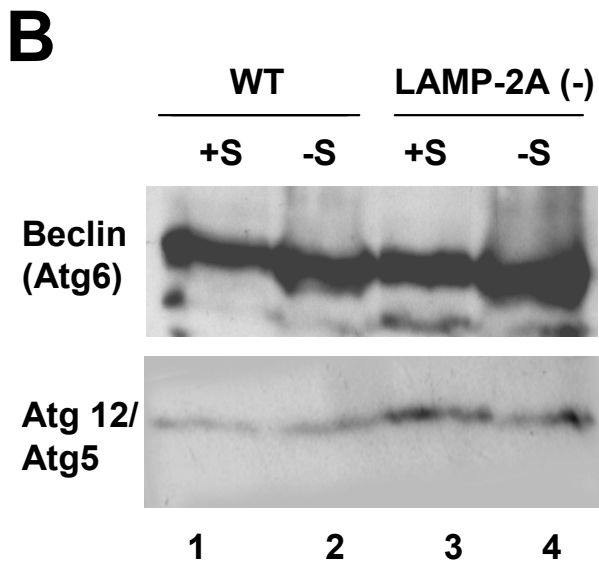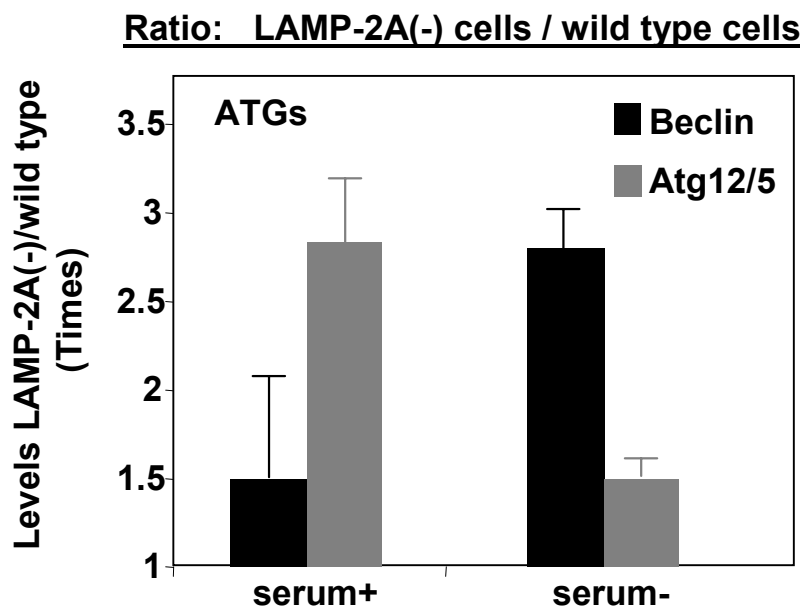

Supplement: pnas_0507436103_2.pdf [file pnas_0507436103_2.pdf]
